# Supplementary material for: Construction of a high-density genetic map and fine QTL mapping for growth and nutritional traits of Crassostrea gigas
Source: BMC Genomics. 2018 Aug 22;19:626. doi: 10.1186/s12864-018-4996-z (PMC6106840; doi:10.1186/s12864-018-4996-z)
Supplement: Supplementary file 1 — Adaptors and primers used in this study. (XLS 34 kb) [file 12864_2018_4996_MOESM1_ESM.xls]

## Sheet: 工作表1
Adapter/Primer Name	Barcode/Index	Usage	Sequence
Acil-F1	AACT	Library_adapter	ACACTCTTTCCCTACACGACGCTCTTCCGATCTAACT
Acil-F2	CCAAT	Library_adapter	ACACTCTTTCCCTACACGACGCTCTTCCGATCTCCAAT
Acil-F3	TTGCAA	Library_adapter	ACACTCTTTCCCTACACGACGCTCTTCCGATCTTTGCAA
Acil-F4	CGTGGTA	Library_adapter	ACACTCTTTCCCTACACGACGCTCTTCCGATCTCGTGGTA
Acil-F5	GAACAATA	Library_adapter	ACACTCTTTCCCTACACGACGCTCTTCCGATCTGAACAATA
Acil-F6	ACCACCGTA	Library_adapter	ACACTCTTTCCCTACACGACGCTCTTCCGATCTACCACCGTA
Acil-F7	CTTGTTAATA	Library_adapter	ACACTCTTTCCCTACACGACGCTCTTCCGATCTCTTGTTAATA
Acil-F8	TCGTGGTTATA	Library_adapter	ACACTCTTTCCCTACACGACGCTCTTCCGATCTTCGTGGTTATA
Acil-F9	GGAACAAGTATA	Library_adapter	ACACTCTTTCCCTACACGACGCTCTTCCGATCTGGAACAAGTATA
Acil-R1		Library_adapter	CGAGTTAGATCGGAAGAGCGTCGTGTAGGGAAAGAGTGT
Acil-R2		Library_adapter	CGATTGGAGATCGGAAGAGCGTCGTGTAGGGAAAGAGTGT
Acil-R3		Library_adapter	CGTTGCAAAGATCGGAAGAGCGTCGTGTAGGGAAAGAGTGT
Acil-R4		Library_adapter	CGTACCACGAGATCGGAAGAGCGTCGTGTAGGGAAAGAGTGT
Acil-R5		Library_adapter	CGTATTGTTCAGATCGGAAGAGCGTCGTGTAGGGAAAGAGTGT
Acil-R6		Library_adapter	CGTACGGTGGTAGATCGGAAGAGCGTCGTGTAGGGAAAGAGTGT
Acil-R7		Library_adapter	CGTATTAACAAGAGATCGGAAGAGCGTCGTGTAGGGAAAGAGTGT
Acil-R8		Library_adapter	CGTATAACCACGAAGATCGGAAGAGCGTCGTGTAGGGAAAGAGTGT
Acil-R9		Library_adapter	CGTATACTTGTTCCAGATCGGAAGAGCGTCGTGTAGGGAAAGAGTGT
BfaI-R1	AACT	Library_adapter	GTGACTGGAGTTCAGACGTGTGCTCTTCCGATCTAACT
BfaI-R2	CCAAG	Library_adapter	GTGACTGGAGTTCAGACGTGTGCTCTTCCGATCTCCAAG
BfaI-R3	TTGCAG	Library_adapter	GTGACTGGAGTTCAGACGTGTGCTCTTCCGATCTTTGCAG
BfaI-R4	GGTGCCA	Library_adapter	GTGACTGGAGTTCAGACGTGTGCTCTTCCGATCTGGTGCCA
BfaI-R5	AACAATCG	Library_adapter	GTGACTGGAGTTCAGACGTGTGCTCTTCCGATCTAACAATCG
BfaI-R6	CCACCATCG	Library_adapter	GTGACTGGAGTTCAGACGTGTGCTCTTCCGATCTCCACCATCG
BfaI-R7	TTGTTCCACA	Library_adapter	GTGACTGGAGTTCAGACGTGTGCTCTTCCGATCTTTGTTCCACA
BfaI-R8	GGTGAGGCACA	Library_adapter	GTGACTGGAGTTCAGACGTGTGCTCTTCCGATCTGGTGAGGCACA
BfaI-R9	AACAGAATCTCA	Library_adapter	GTGACTGGAGTTCAGACGTGTGCTCTTCCGATCTAACAGAATCTCA
BfaI-R10	CCACCTCATCTCG	Library_adapter	GTGACTGGAGTTCAGACGTGTGCTCTTCCGATCTCCACCTCATCTCG
BfaI-F1		Library_adapter	TAAGTTAGATCGGAAGAGCGAGAACAA
BfaI-F2		Library_adapter	TACTTGGAGATCGGAAGAGCGAGAACAA
BfaI-F3		Library_adapter	TACTGCAAAGATCGGAAGAGCGAGAACAA
BfaI-F4		Library_adapter	TATGGCACCAGATCGGAAGAGCGAGAACAA
BfaI-F5		Library_adapter	TACGATTGTTAGATCGGAAGAGCGAGAACAA
BfaI-F6		Library_adapter	TACGATGGTGGAGATCGGAAGAGCGAGAACAA
BfaI-F7		Library_adapter	TATGTGGAACAAAGATCGGAAGAGCGAGAACAA
BfaI-F8		Library_adapter	TATGTGCCTCACCAGATCGGAAGAGCGAGAACAA
BfaI-F9		Library_adapter	TATGAGATTCTGTTAGATCGGAAGAGCGAGAACAA
BfaI-F10		Library_adapter	TACGAGATGAGGTGGAGATCGGAAGAGCGAGAACAA
PCR-F		Library_amplication	AATGATACGGCGACCACCGAGATCTACACTCTTTCCCTACACGACGCTCTTCCGATCT
PCR-R-index6	GCCAAT	Library_amplication	CAAGCAGAAGACGGCATACGAGATATTGGCGTGACTGGAGTTCAGACGTGTGCTCTTCCGATCT
PCR-R-index12	CTTGTA	Library_amplication	CAAGCAGAAGACGGCATACGAGATTACAAGGTGACTGGAGTTCAGACGTGTGCTCTTCCGATCT
AMY F1		RT-PCR	CTTGTGGTAACGGATGGGTATG
AMY R1		RT-PCR	AAGCCAGTTTGAAGGGTTCG
BMP1 F1		RT-PCR	TTCACAACGGATAGCAGTACATCA
BMP1 R1		RT-PCR	CACTCCAATCACGGCACCA
P5CS F1		RT-PCR	CAAAACTGCCCAGGTTCTCATC
P5CS R1		RT-PCR	CTCCTTCAGCGTCCCTATCAA
GP F1		RT-PCR	AAATCAGTATTCGTGGTATTGCTCC
GP R1		RT-PCR	TGTCGCCACATTTCTATCTTTCA
ADAMTS F1		RT-PCR	CCAAGACGCCGAACCTTT
ADAMTS R1		RT-PCR	CCTCTGATAACAATGGCACTCC
DYRK F1		RT-PCR	CACAGAGGGTGGTAAGCTGGTAG
DYRK R1		RT-PCR	CCCGTGTTGATGGTGGAATAG
