# Supplementary material for: Construction of a high-density genetic map and fine QTL mapping for growth and nutritional traits of Crassostrea gigas
Source: BMC Genomics. 2018 Aug 22;19:626. doi: 10.1186/s12864-018-4996-z (PMC6106840; doi:10.1186/s12864-018-4996-z)
Supplement: Supplementary file 8 — Summary of the sex-specific maps. (XLS 35 kb) [file 12864_2018_4996_MOESM8_ESM.xls]

## Sheet: 工作表1
Linkage group	Paternal map				Maternal map				F:M ratio
	No. of Markers	Length (cM)	Marker interval	Shared marker interval	No. of Markers	Length (cM)	Marker interval	Shared marker interval	Map length ratio	Marker interval ratio	Recombination Rate ratio
1	317	159.796	0.504088	1.38573	328	200.888	0.612463	1.75148	1.25715	1.21499	1.26394
2	272	177.055	0.650938	1.63325	327	252.638	0.772593	2.29943	1.42689	1.18689	1.40788
3	240	180.903	0.753763	2.29981	247	190.036	0.769377	2.29343	1.05049	1.02071	0.997228
4	558	268.302	0.480828	1.24929	605	348.451	0.575952	1.62947	1.29873	1.19783	1.30432
5	257	147.846	0.575276	1.77158	220	145.57	0.661682	1.7674	0.984606	1.1502	0.997639
6	409	174.66	0.427042	2.79522	11	11.533	1.04845	1.21389	0.0660311	2.45516	0.434273
7	230	121.528	0.528383	1.2397	229	164.747	0.719419	1.68755	1.35563	1.36155	1.36125
8	534	291.471	0.545826	1.81091	314	267.882	0.853127	1.62832	0.919069	1.563	0.899173
9	142	161.406	1.13666	2.60332	411	202.328	0.492282	3.24376	1.25353	0.433095	1.24601
10	34	82.524	2.42718	5.74227	271	147.183	0.543111	4.359	1.78352	0.223762	0.759107
All	2993	1765.49			2963	1931.26			1.09389
Average	299.3	176.549	0.59	2.25311	296.3	193.126	0.65	2.18737	1.13956	1.18072	1.06708
